# Supplementary material for: Intact cord resuscitation versus early cord clamping in the treatment of depressed newborn infants during the first 10 minutes of birth (Nepcord III) – a randomized clinical trial
Source: PubMed Central journal article supplement (PMC6714434; doi:10.1186/s40748-019-0110-z), 2019-08-29
Supplement: 40748_2019_110_MOESM1_ESM.pdf [file 40748_2019_110_MOESM1_ESM.pdf]

| Descriptives                        |                                          | N   | Mean    | Std. Deviation | Std. Error | 95% Confidence Interval for |             | Minimum | Maximum |
|-------------------------------------|------------------------------------------|-----|---------|----------------|------------|-----------------------------|-------------|---------|---------|
|                                     |                                          |     |         |                |            | Lower Bound                 | Upper Bound |         |         |
| Gestational age                     | Early                                    | 97  | 39,63   | 1,3782         | 0,1399     | 39,353                      | 39,908      | 35,1    | 42      |
|                                     | ICR group DCC < 180 s (protocol breaker) | 69  | 39,741  | 1,358          | 0,1635     | 39,415                      | 40,067      | 35,4    | 42      |
|                                     | ICR group DCC ≥ 180 (per protocol)       | 65  | 39,387  | 1,4213         | 0,1763     | 39,035                      | 39,739      | 34,9    | 41,6    |
|                                     | Total                                    | 231 | 39,595  | 1,3854         | 0,0912     | 39,415                      | 39,775      | 34,9    | 42      |
| Birth weight (grams)                | Early                                    | 95  | 3036,53 | 372,33         | 38,2       | 2960,68                     | 3112,37     | 1920    | 4000    |
|                                     | ICR group DCC < 180 s (protocol breaker) | 69  | 3054,93 | 425,245        | 51,194     | 2952,77                     | 3157,08     | 2060    | 4120    |
|                                     | ICR group DCC ≥ 180 (per protocol)       | 65  | 3090,38 | 377,069        | 46,77      | 2996,95                     | 3183,82     | 2230    | 4080    |
|                                     | Total                                    | 229 | 3057,36 | 389,219        | 25,72      | 3006,68                     | 3108,04     | 1920    | 4120    |
| Time to umbilical cord was clamped  | Early                                    | 97  | 26,13   | 17,064         | 1,733      | 22,69                       | 29,57       | 0       | 59      |
|                                     | ICR group DCC < 180 s (protocol breaker) | 69  | 33,68   | 29,186         | 3,514      | 26,67                       | 40,69       | 0       | 126     |
|                                     | ICR group DCC ≥ 180 (per protocol)       | 65  | 195,54  | 15,099         | 1,873      | 191,8                       | 199,28      | 180     | 282     |
|                                     | Total                                    | 231 | 76,06   | 77,853         | 5,122      | 65,96                       | 86,15       | 0       | 282     |
| Time of POX placement               | Early                                    | 93  | 40,05   | 4,73           | 0,491      | 39,08                       | 41,03       | 28      | 49      |
|                                     | ICR group DCC < 180 s (protocol breaker) | 66  | 40,52   | 4,638          | 0,571      | 39,37                       | 41,66       | 30      | 49      |
|                                     | ICR group DCC ≥ 180 (per protocol)       | 63  | 41,24   | 5,044          | 0,635      | 39,97                       | 42,51       | 30      | 49      |
|                                     | Total                                    | 222 | 40,53   | 4,798          | 0,322      | 39,89                       | 41,16       | 28      | 49      |
| POX Saturation reading at 1 minute  | Early                                    | 93  | 62,41   | 4,339          | 0,45       | 61,51                       | 63,3        | 45      | 69      |
|                                     | ICR group DCC < 180 s (protocol breaker) | 66  | 63,62   | 5,241          | 0,645      | 62,33                       | 64,91       | 47      | 74      |
|                                     | ICR group DCC ≥ 180 (per protocol)       | 63  | 79,79   | 3,633          | 0,458      | 78,88                       | 80,71       | 68      | 86      |
|                                     | Total                                    | 222 | 67,7    | 8,835          | 0,593      | 66,53                       | 68,87       | 45      | 86      |
| POX Saturation reading at 5 minute  | Early                                    | 93  | 76,62   | 4,128          | 0,428      | 75,77                       | 77,47       | 64      | 87      |
|                                     | ICR group DCC < 180 s (protocol breaker) | 66  | 76,18   | 3,142          | 0,387      | 75,41                       | 76,95       | 66      | 83      |
|                                     | ICR group DCC ≥ 180 (per protocol)       | 63  | 91,44   | 3,068          | 0,387      | 90,67                       | 92,22       | 80      | 94      |
|                                     | Total                                    | 222 | 80,7    | 7,657          | 0,514      | 79,69                       | 81,71       | 64      | 94      |
| POX Saturation reading at 10 minute | Early                                    | 93  | 85,4    | 2,715          | 0,282      | 84,84                       | 85,96       | 77      | 89      |
|                                     | ICR group DCC < 180 s (protocol breaker) | 66  | 83,09   | 4,139          | 0,509      | 82,07                       | 84,11       | 77      | 90      |
|                                     | ICR group DCC ≥ 180 (per protocol)       | 63  | 97,98   | 1,431          | 0,18       | 97,62                       | 98,34       | 95      | 100     |
|                                     | Total                                    | 222 | 88,28   | 6,86           | 0,46       | 87,38                       | 89,19       | 77      | 100     |
| POX Heart rate reading at 1 minute  | Early                                    | 93  | 115,74  | 4,845          | 0,502      | 114,74                      | 116,74      | 104     | 132     |
|                                     | ICR group DCC < 180 s (protocol breaker) | 66  | 106,18  | 3,215          | 0,396      | 105,39                      | 106,97      | 101     | 121     |
|                                     | ICR group DCC ≥ 180 (per protocol)       | 63  | 104,75  | 2,885          | 0,363      | 104,02                      | 105,47      | 100     | 111     |
|                                     | Total                                    | 222 | 109,78  | 6,418          | 0,431      | 108,93                      | 110,63      | 100     | 132     |
| POX Heart rate reading at 5 minute  | Early                                    | 93  | 133,62  | 4,115          | 0,427      | 132,78                      | 134,47      | 121     | 140     |
|                                     | ICR group DCC < 180 s (protocol breaker) | 66  | 123,18  | 4,472          | 0,55       | 122,08                      | 124,28      | 117     | 135     |
|                                     | ICR group DCC ≥ 180 (per protocol)       | 63  | 125,05  | 2,964          | 0,373      | 124,3                       | 125,79      | 120     | 134     |
|                                     | Total                                    | 222 | 128,09  | 6,174          | 0,414      | 127,27                      | 128,9       | 117     | 140     |
| POX Heart rate reading at 10 minute | Early                                    | 93  | 135,44  | 2,357          | 0,244      | 134,96                      | 135,93      | 127     | 139     |
|                                     | ICR group DCC < 180 s (protocol breaker) | 66  | 135,36  | 2,237          | 0,275      | 134,81                      | 135,91      | 126     | 139     |
|                                     | ICR group DCC ≥ 180 (per protocol)       | 63  | 136,98  | 2,218          | 0,279      | 136,43                      | 137,54      | 131     | 140     |
|                                     | Total                                    | 222 | 135,86  | 2,381          | 0,16       | 135,54                      | 136,17      | 126     | 140     |
| Apgar 1 min                         | Early                                    | 97  | 4,27    | 1,026          | 0,104      | 4,06                        | 4,47        | 0       | 6       |
|                                     | ICR group DCC < 180 s (protocol breaker) | 69  | 4,52    | 0,797          | 0,096      | 4,33                        | 4,71        | 2       | 6       |
|                                     | ICR group DCC ≥ 180 (per protocol)       | 65  | 5,68    | 0,85           | 0,105      | 5,47                        | 5,89        | 4       | 7       |
|                                     | Total                                    | 231 | 4,74    | 1,088          | 0,072      | 4,6                         | 4,88        | 0       | 7       |
| Apgar 5 min                         | Early                                    | 97  | 6,51    | 1,032          | 0,105      | 6,3                         | 6,71        | 2       | 8       |
|                                     | ICR group DCC < 180 s (protocol breaker) | 69  | 6,61    | 0,79           | 0,095      | 6,42                        | 6,8         | 4       | 8       |

|                                                |                                          |     |         |         |         |         |         |       |       |
|------------------------------------------------|------------------------------------------|-----|---------|---------|---------|---------|---------|-------|-------|
|                                                | ICR group DCC >= 180 (per protocol)      | 65  | 7,02    | 0,515   | 0,064   | 6,89    | 7,14    | 5     | 8     |
|                                                | Total                                    | 231 | 6,68    | 0,866   | 0,057   | 6,57    | 6,79    | 2     | 8     |
| Apgar 10 min                                   | Early                                    | 96  | 8,97    | 1,49    | 0,152   | 8,67    | 9,27    | 2     | 10    |
|                                                | ICR group DCC < 180 s (protocol breaker) | 69  | 9,1     | 1,19    | 0,143   | 8,82    | 9,39    | 5     | 10    |
|                                                | ICR group DCC >= 180 (per protocol)      | 65  | 9,65    | 0,738   | 0,092   | 9,46    | 9,83    | 7     | 10    |
|                                                | Total                                    | 230 | 9,2     | 1,255   | 0,083   | 9,04    | 9,36    | 2     | 10    |
| Baby's Temperature (Celcius)                   | Early                                    | 90  | 36,1951 | 0,4951  | 0,05219 | 36,0914 | 36,2988 | 34,61 | 37,06 |
|                                                | ICR group DCC < 180 s (protocol breaker) | 66  | 36,2012 | 0,50813 | 0,06255 | 36,0763 | 36,3261 | 35,11 | 37,67 |
|                                                | ICR group DCC >= 180 (per protocol)      | 64  | 36,1753 | 0,55496 | 0,06937 | 36,0367 | 36,314  | 34,61 | 37,61 |
|                                                | Total                                    | 220 | 36,1912 | 0,51474 | 0,0347  | 36,1228 | 36,2596 | 34,61 | 37,67 |
| Transcutaneous bilirubin measured at discharge | Early                                    | 91  | 89,08   | 52,617  | 5,516   | 78,12   | 100,04  | 18    | 321   |
|                                                | ICR group DCC < 180 s (protocol breaker) | 68  | 100,79  | 58,998  | 7,155   | 86,51   | 115,07  | 21    | 335   |
|                                                | ICR group DCC >= 180 (per protocol)      | 59  | 94,42   | 44,093  | 5,74    | 82,93   | 105,91  | 1     | 222   |
|                                                | Total                                    | 218 | 94,18   | 52,605  | 3,563   | 87,16   | 101,2   | 1     | 335   |

#### ANOVA

|                                     |                | Sum of Square | df  | Mean Square | F        | Sig.   |
|-------------------------------------|----------------|---------------|-----|-------------|----------|--------|
| Gestational age                     | Between Groups | 4,413         | 2   | 2,207       | 1,151    | 0,318  |
|                                     | Within Groups  | 437,051       | 228 | 1,917       |          |        |
|                                     | Total          | 441,464       | 230 |             |          |        |
| Birth weight (grams)                | Between Groups | 112532,931    | 2   | 56266,466   | 0,369    | 0,692  |
|                                     | Within Groups  | 34427443,7    | 226 | 152333,822  |          |        |
|                                     | Total          | 34539976,6    | 228 |             |          |        |
| Time to umbilical cord was clamped  | Between Groups | 1293585,87    | 2   | 646792,936  | 1467,842 | <0.001 |
|                                     | Within Groups  | 100466,397    | 228 | 440,642     |          |        |
|                                     | Total          | 1394052,27    | 230 |             |          |        |
| Time of POX placement               | Between Groups | 52,693        | 2   | 26,347      | 1,146    | 0,32   |
|                                     | Within Groups  | 5034,645      | 219 | 22,989      |          |        |
|                                     | Total          | 5087,338      | 221 |             |          |        |
| POX Saturation reading at 1 minute  | Between Groups | 12916,058     | 2   | 6458,029    | 326,154  | <0.001 |
|                                     | Within Groups  | 4336,321      | 219 | 19,801      |          |        |
|                                     | Total          | 17252,378     | 221 |             |          |        |
| POX Saturation reading at 5 minute  | Between Groups | 10165,578     | 2   | 5082,789    | 398,514  | <0.001 |
|                                     | Within Groups  | 2793,202      | 219 | 12,754      |          |        |
|                                     | Total          | 12958,779     | 221 |             |          |        |
| POX Saturation reading at 10 minute | Between Groups | 8482,403      | 2   | 4241,202    | 484,085  | <0.001 |
|                                     | Within Groups  | 1918,718      | 219 | 8,761       |          |        |
|                                     | Total          | 10401,122     | 221 |             |          |        |
| POX Heart rate reading at 1 minute  | Between Groups | 5756,624      | 2   | 2878,312    | 188,301  | <0.001 |
|                                     | Within Groups  | 3347,561      | 219 | 15,286      |          |        |
|                                     | Total          | 9104,185      | 221 |             |          |        |
| POX Heart rate reading at 5 minute  | Between Groups | 5020,871      | 2   | 2510,435    | 161,583  | <0.001 |
|                                     | Within Groups  | 3402,503      | 219 | 15,537      |          |        |
|                                     | Total          | 8423,374      | 221 |             |          |        |
| POX Heart rate reading at 10 minute | Between Groups | 112,206       | 2   | 56,103      | 10,767   | <0.001 |
|                                     | Within Groups  | 1141,182      | 219 | 5,211       |          |        |
|                                     | Total          | 1253,387      | 221 |             |          |        |
| Apgar 1 min                         | Between Groups | 81,952        | 2   | 40,976      | 49,051   | <0.001 |
|                                     | Within Groups  | 190,464       | 228 | 0,835       |          |        |
|                                     | Total          | 272,416       | 230 |             |          |        |
| Apgar 5 min                         | Between Groups | 10,628        | 2   | 5,314       | 7,494    | 0,001  |
|                                     | Within Groups  | 161,667       | 228 | 0,709       |          |        |
|                                     | Total          | 172,294       | 230 |             |          |        |
| Apgar 10 min                        | Between Groups | 18,742        | 2   | 9,371       | 6,219    | 0,002  |
|                                     | Within Groups  | 342,058       | 227 | 1,507       |          |        |
|                                     | Total          | 360,8         | 229 |             |          |        |
| Baby's Temperature (Celcius)        | Between Groups | 0,024         | 2   | 0,012       | 0,045    | 0,956  |
|                                     | Within Groups  | 58,001        | 217 | 0,267       |          |        |
|                                     | Total          | 58,025        | 219 |             |          |        |

|                                                |                |            |     |          |       |       |
|------------------------------------------------|----------------|------------|-----|----------|-------|-------|
| Transcutaneous bilirubin measured at discharge | Between Groups | 5348,037   | 2   | 2674,018 | 0,966 | 0,382 |
|                                                | Within Groups  | 595151,986 | 215 | 2768,149 |       |       |
|                                                | Total          | 600500,023 | 217 |          |       |       |

Post Hoc Tests  
Multiple Comparisons  
Bonferroni

| Dependent Variable                  | (I) Studygroup_pp_3                     | (J) Studygroup | Mean      | Differen | Std. Error | Sig.    | 95% Confidence Interval |             |
|-------------------------------------|-----------------------------------------|----------------|-----------|----------|------------|---------|-------------------------|-------------|
|                                     |                                         |                |           |          |            |         | Lower Bound             | Upper Bound |
| Gestational age                     | Early                                   | ICR group DCC  | -0,1109   | 0,218    | >0.99      | -0,637  | 0,415                   |             |
|                                     |                                         | ICR group DCC  | 0,2435    | 0,2219   | 0,821      | -0,292  | 0,779                   |             |
|                                     | ICR group DCC <180 s (protocol breaker) | Early          | 0,1109    | 0,218    | >0.99      | -0,415  | 0,637                   |             |
|                                     |                                         | ICR group DCC  | 0,3544    | 0,2393   | 0,42       | -0,223  | 0,932                   |             |
|                                     | ICR group DCC >= 180 (per protocol)     | Early          | -0,2435   | 0,2219   | 0,821      | -0,779  | 0,292                   |             |
|                                     |                                         | ICR group DCC  | -0,3544   | 0,2393   | 0,42       | -0,932  | 0,223                   |             |
| Birth weight (grams)                | Early                                   | ICR group DCC  | -18,401   | 61,735   | >0.99      | -167,3  | 130,5                   |             |
|                                     |                                         | ICR group DCC  | -53,858   | 62,826   | >0.99      | -205,39 | 97,67                   |             |
|                                     | ICR group DCC <180 s (protocol breaker) | Early          | 18,401    | 61,735   | >0.99      | -130,5  | 167,3                   |             |
|                                     |                                         | ICR group DCC  | -35,457   | 67,464   | >0.99      | -198,17 | 127,26                  |             |
|                                     | ICR group DCC >= 180 (per protocol)     | Early          | 53,858    | 62,826   | >0.99      | -97,67  | 205,39                  |             |
|                                     |                                         | ICR group DCC  | 35,457    | 67,464   | >0.99      | -127,26 | 198,17                  |             |
| Time to umbilical cord was clamped  | Early                                   | ICR group DCC  | -7,547    | 3,306    | 0,07       | -15,52  | 0,43                    |             |
|                                     |                                         | ICR group DCC  | -169,404* | 3,365    | <0.001     | -177,52 | -161,29                 |             |
|                                     | ICR group DCC <180 s (protocol breaker) | Early          | 7,547     | 3,306    | 0,07       | -0,43   | 15,52                   |             |
|                                     |                                         | ICR group DCC  | -161,857* | 3,628    | <0.001     | -170,61 | -153,11                 |             |
|                                     | ICR group DCC >= 180 (per protocol)     | Early          | 169,404*  | 3,365    | <0.001     | 161,29  | 177,52                  |             |
|                                     |                                         | ICR group DCC  | 161,857*  | 3,628    | <0.001     | 153,11  | 170,61                  |             |
| Time of POX placement               | Early                                   | ICR group DCC  | -0,461    | 0,772    | >0.99      | -2,32   | 1,4                     |             |
|                                     |                                         | ICR group DCC  | -1,184    | 0,782    | 0,395      | -3,07   | 0,7                     |             |
|                                     | ICR group DCC <180 s (protocol breaker) | Early          | 0,461     | 0,772    | >0.99      | -1,4    | 2,32                    |             |
|                                     |                                         | ICR group DCC  | -0,723    | 0,845    | >0.99      | -2,76   | 1,31                    |             |
|                                     | ICR group DCC >= 180 (per protocol)     | Early          | 1,184     | 0,782    | 0,395      | -0,7    | 3,07                    |             |
|                                     |                                         | ICR group DCC  | 0,723     | 0,845    | >0.99      | -1,31   | 2,76                    |             |
| POX Saturation reading at 1 minute  | Early                                   | ICR group DCC  | -1,213    | 0,716    | 0,276      | -2,94   | 0,52                    |             |
|                                     |                                         | ICR group DCC  | -17,385*  | 0,726    | <0.001     | -19,14  | -15,63                  |             |
|                                     | ICR group DCC <180 s (protocol breaker) | Early          | 1,213     | 0,716    | 0,276      | -0,52   | 2,94                    |             |
|                                     |                                         | ICR group DCC  | -16,172*  | 0,784    | <0.001     | -18,06  | -14,28                  |             |
|                                     | ICR group DCC >= 180 (per protocol)     | Early          | 17,385*   | 0,726    | <0.001     | 15,63   | 19,14                   |             |
|                                     |                                         | ICR group DCC  | 16,172*   | 0,784    | <0.001     | 14,28   | 18,06                   |             |
| POX Saturation reading at 5 minute  | Early                                   | ICR group DCC  | 0,442     | 0,575    | >0.99      | -0,94   | 1,83                    |             |
|                                     |                                         | ICR group DCC  | -14,821*  | 0,583    | <0.001     | -16,23  | -13,41                  |             |
|                                     | ICR group DCC <180 s (protocol breaker) | Early          | -0,442    | 0,575    | >0.99      | -1,83   | 0,94                    |             |
|                                     |                                         | ICR group DCC  | -15,263*  | 0,629    | <0.001     | -16,78  | -13,75                  |             |
|                                     | ICR group DCC >= 180 (per protocol)     | Early          | 14,821*   | 0,583    | <0.001     | 13,41   | 16,23                   |             |
|                                     |                                         | ICR group DCC  | 15,263*   | 0,629    | <0.001     | 13,75   | 16,78                   |             |
| POX Saturation reading at 10 minute | Early                                   | ICR group DCC  | 2,307*    | 0,476    | <0.001     | 1,16    | 3,46                    |             |
|                                     |                                         | ICR group DCC  | -12,586*  | 0,483    | <0.001     | -13,75  | -11,42                  |             |
|                                     | ICR group DCC <180 s (protocol breaker) | Early          | -2,307*   | 0,476    | <0.001     | -3,46   | -1,16                   |             |
|                                     |                                         | ICR group DCC  | -14,893*  | 0,521    | <0.001     | -16,15  | -13,64                  |             |
|                                     | ICR group DCC >= 180 (per protocol)     | Early          | 12,586*   | 0,483    | <0.001     | 11,42   | 13,75                   |             |
|                                     |                                         | ICR group DCC  | 14,893*   | 0,521    | <0.001     | 13,64   | 16,15                   |             |
| POX Heart rate reading at 1 minute  | Early                                   | ICR group DCC  | 9,560*    | 0,629    | <0.001     | 8,04    | 11,08                   |             |
|                                     |                                         | ICR group DCC  | 10,996*   | 0,638    | <0.001     | 9,46    | 12,53                   |             |
|                                     | ICR group DCC                           | -9,560*        | 0,629     | <0.001   | -11,08     | -8,04   |                         |             |
|                                     |                                         | ICR group DCC  | 1,436     | 0,689    | 0,115      | -0,23   | 3,1                     |             |

|                                                |                                          |       |                       |          |         |         |         |        |
|------------------------------------------------|------------------------------------------|-------|-----------------------|----------|---------|---------|---------|--------|
|                                                | ICR group DCC $\geq$ 180 (per protocol)  | Early | -10,996*              | 0,638    | <0.001  | -12,53  | -9,46   |        |
|                                                |                                          |       | ICR group DCC         | -1,436   | 0,689   | 0,115   | -3,1    | 0,23   |
| POX Heart rate reading at 5 minute             |                                          | Early | ICR group DCC 10,442* | 0,634    | <0.001  | 8,91    | 11,97   |        |
|                                                |                                          |       | ICR group DCC 8,576*  | 0,643    | <0.001  | 7,02    | 10,13   |        |
|                                                | ICR group DCC < 180 s (protocol breaker) | Early | -10,442*              | 0,634    | <0.001  | -11,97  | -8,91   |        |
|                                                |                                          |       | ICR group DCC -1,866* | 0,694    | 0,023   | -3,54   | -0,19   |        |
|                                                | ICR group DCC $\geq$ 180 (per protocol)  | Early | -8,576*               | 0,643    | <0.001  | -10,13  | -7,02   |        |
|                                                |                                          |       | ICR group DCC 1,866*  | 0,694    | 0,023   | 0,19    | 3,54    |        |
| POX Heart rate reading at 10 minute            |                                          | Early | ICR group DCC         | 0,077    | 0,367   | >0.99   | -0,81   | 0,96   |
|                                                |                                          |       | ICR group DCC -1,543* | 0,372    | <0.001  | -2,44   | -0,64   |        |
|                                                | ICR group DCC < 180 s (protocol breaker) | Early | -0,077                | 0,367    | >0.99   | -0,96   | 0,81    |        |
|                                                |                                          |       | ICR group DCC -1,620* | 0,402    | <0.001  | -2,59   | -0,65   |        |
|                                                | ICR group DCC $\geq$ 180 (per protocol)  | Early | 1,543*                | 0,372    | <0.001  | 0,64    | 2,44    |        |
|                                                |                                          |       | ICR group DCC 1,620*  | 0,402    | <0.001  | 0,65    | 2,59    |        |
| Apgar 1 min                                    |                                          | Early | ICR group DCC         | -0,254   | 0,144   | 0,238   | -0,6    | 0,09   |
|                                                |                                          |       | ICR group DCC -1,409* | 0,147    | <0.001  | -1,76   | -1,06   |        |
|                                                | ICR group DCC < 180 s (protocol breaker) | Early | 0,254                 | 0,144    | 0,238   | -0,09   | 0,6     |        |
|                                                |                                          |       | ICR group DCC -1,155* | 0,158    | <0.001  | -1,54   | -0,77   |        |
|                                                | ICR group DCC $\geq$ 180 (per protocol)  | Early | 1,409*                | 0,147    | <0.001  | 1,06    | 1,76    |        |
|                                                |                                          |       | ICR group DCC 1,155*  | 0,158    | <0.001  | 0,77    | 1,54    |        |
| Apgar 5 min                                    |                                          | Early | ICR group DCC         | -0,104   | 0,133   | >0.99   | -0,42   | 0,22   |
|                                                |                                          |       | ICR group DCC -5,10*  | 0,135    | 0,001   | -0,84   | -0,18   |        |
|                                                | ICR group DCC < 180 s (protocol breaker) | Early | 0,104                 | 0,133    | >0.99   | -0,22   | 0,42    |        |
|                                                |                                          |       | ICR group DCC -4,07*  | 0,146    | 0,017   | -0,76   | -0,06   |        |
|                                                | ICR group DCC $\geq$ 180 (per protocol)  | Early | ,510*                 | 0,135    | 0,001   | 0,18    | 0,84    |        |
|                                                |                                          |       | ICR group DCC ,407*   | 0,146    | 0,017   | 0,06    | 0,76    |        |
| Apgar 10 min                                   |                                          | Early | ICR group DCC         | -0,133   | 0,194   | >0.99   | -0,6    | 0,33   |
|                                                |                                          |       | ICR group DCC -6,77*  | 0,197    | 0,002   | -1,15   | -0,2    |        |
|                                                | ICR group DCC < 180 s (protocol breaker) | Early | 0,133                 | 0,194    | >0.99   | -0,33   | 0,6     |        |
|                                                |                                          |       | ICR group DCC -5,45*  | 0,212    | 0,033   | -1,06   | -0,03   |        |
|                                                | ICR group DCC $\geq$ 180 (per protocol)  | Early | ,677*                 | 0,197    | 0,002   | 0,2     | 1,15    |        |
|                                                |                                          |       | ICR group DCC ,545*   | 0,212    | 0,033   | 0,03    | 1,06    |        |
| Baby's Temperature (Celcius)                   |                                          | Early | ICR group DCC         | -0,00612 | 0,08378 | >0.99   | -0,2083 | 0,196  |
|                                                |                                          |       | ICR group DCC         | 0,01971  | 0,08454 | >0.99   | -0,1842 | 0,2237 |
|                                                | ICR group DCC < 180 s (protocol breaker) | Early | 0,00612               | 0,08378  | >0.99   | -0,196  | 0,2083  |        |
|                                                |                                          |       | ICR group DCC         | 0,02583  | 0,0907  | >0.99   | -0,193  | 0,2447 |
|                                                | ICR group DCC $\geq$ 180 (per protocol)  | Early | -0,01971              | 0,08454  | >0.99   | -0,2237 | 0,1842  |        |
|                                                |                                          |       | ICR group DCC         | -0,02583 | 0,0907  | >0.99   | -0,2447 | 0,193  |
| Transcutaneous bilirubin measured at discharge |                                          | Early | ICR group DCC         | -11,717  | 8,434   | 0,499   | -32,07  | 8,63   |
|                                                |                                          |       | ICR group DCC         | -5,347   | 8,794   | >0.99   | -26,57  | 15,87  |
|                                                | ICR group DCC < 180 s (protocol breaker) | Early | 11,717                | 8,434    | 0,499   | -8,63   | 32,07   |        |
|                                                |                                          |       | ICR group DCC         | 6,37     | 9,361   | >0.99   | -16,22  | 28,96  |
|                                                | ICR group DCC $\geq$ 180 (per protocol)  | Early | 5,347                 | 8,794    | >0.99   | -15,87  | 26,57   |        |
|                                                |                                          |       | ICR group DCC         | -6,37    | 9,361   | >0.99   | -28,96  | 16,22  |

\* The mean difference is significant at the 0.05 level.
